# Supplementary material for: Population norms for the EQ-5D-3L in China derived from the 2013 National Health Services Survey
Source: PubMed Central journal article supplement (PMC7916444; doi:10.7189/jogh.11.08001), 2021-02-11
Supplement: jogh-11-08001-s001.pdf [file jogh-11-08001-s001.pdf]

Figures

Figure S1 Correlation between EQ-5D-3L VAS scores and utility index in male respondents ( $r=0.4577$ ,  $P<0.05$ ).

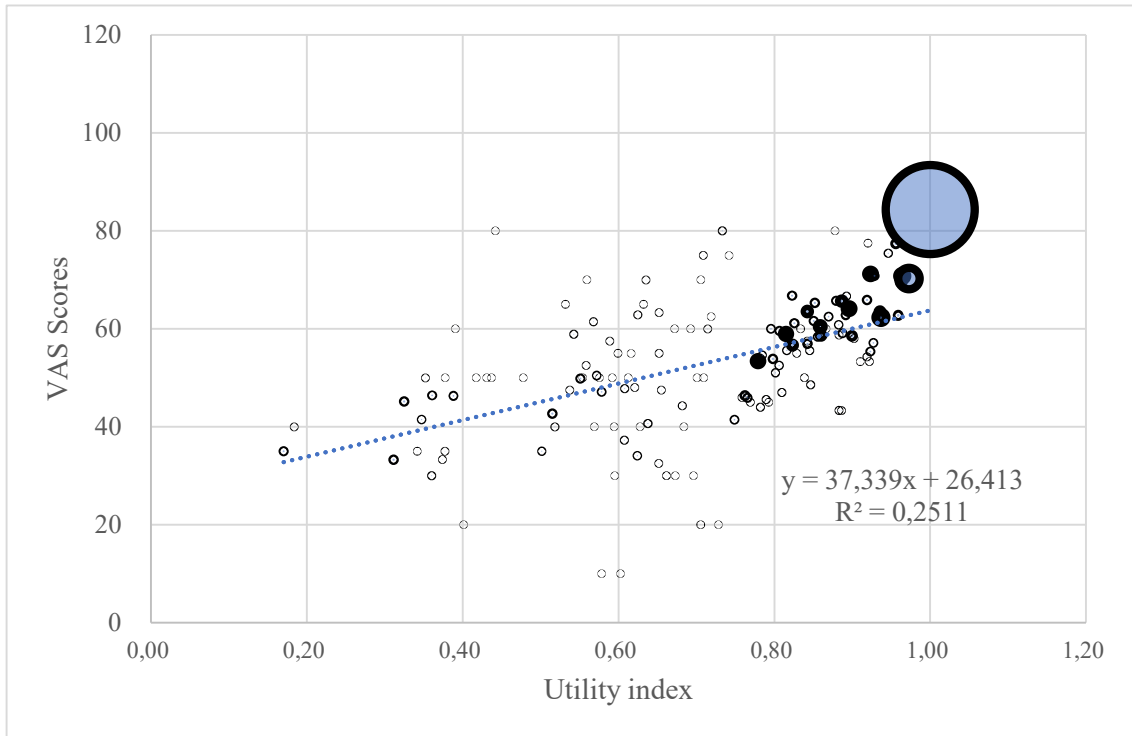

Figure S2 Correlation between EQ-5D-3L VAS scores and utility index in female respondents (r=0.4501, P<0.05).

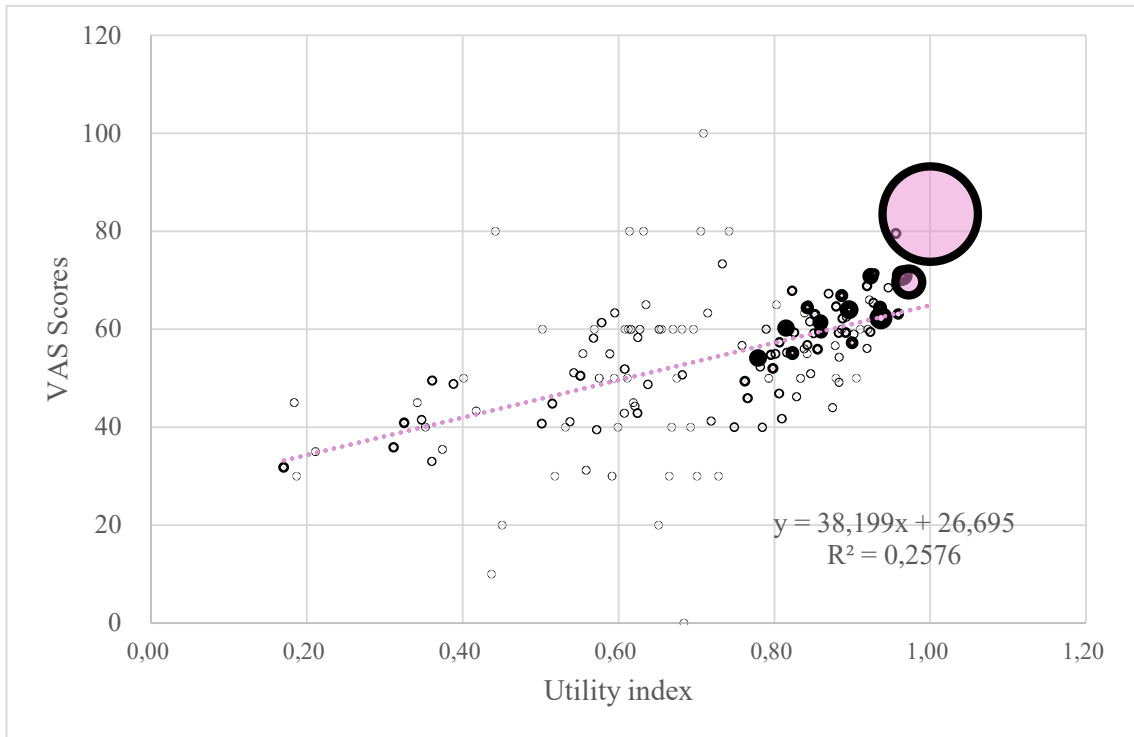

Figure S3 Correlation between EQ-5D-3L VAS scores and utility index in 15-24 years age (r=0.2403, P<0.05).

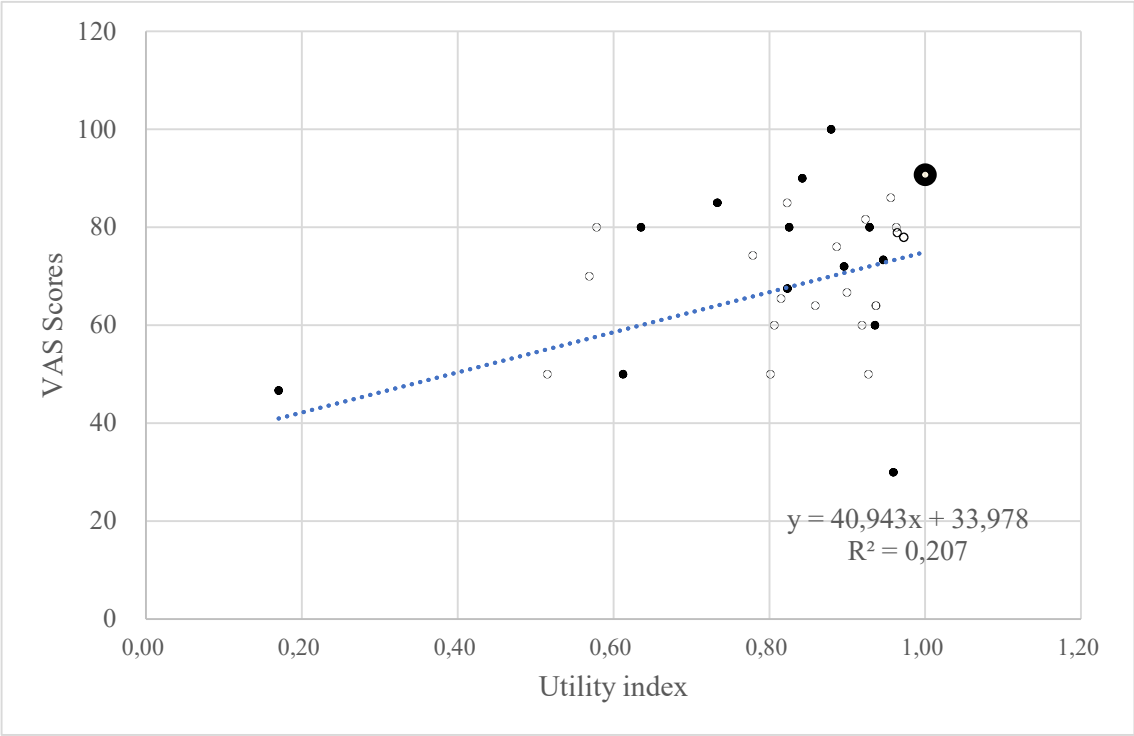

Figure S4 Correlation between EQ-5D-3L VAS scores and utility index in 25-34 years age (r=0.3070, P<0.05).

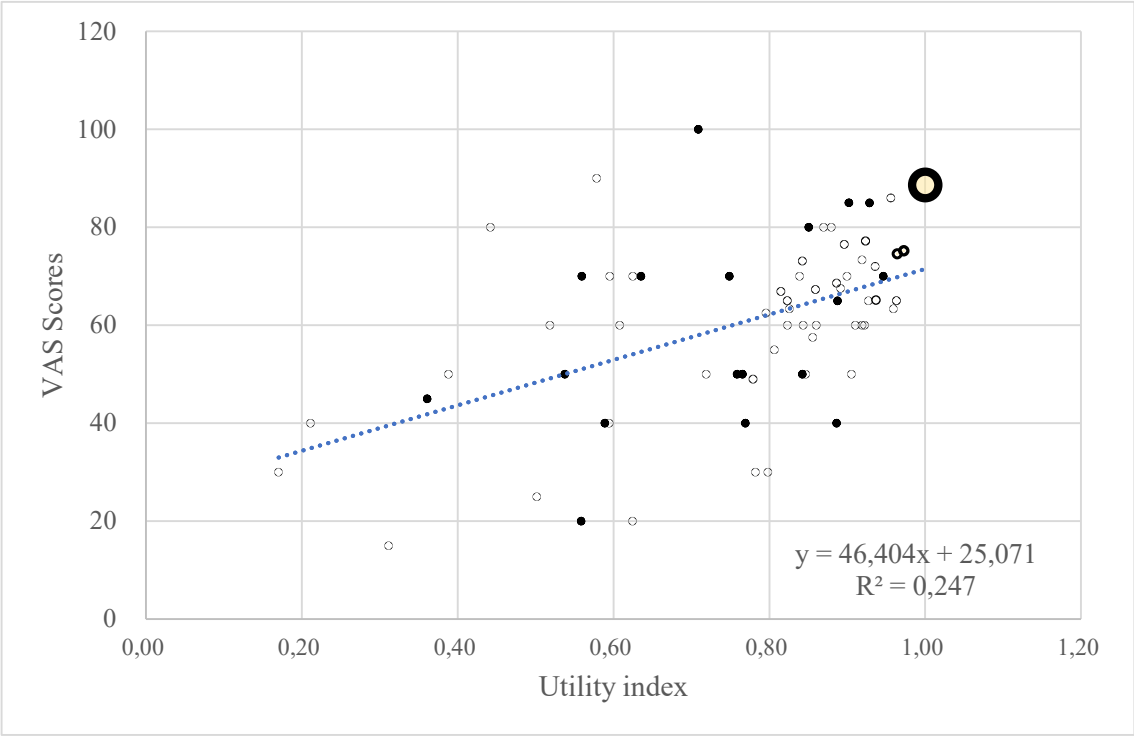

Figure S5 Correlation between EQ-5D-3L VAS scores and utility index in 35-44 years age (r=0.3620, P<0.05).

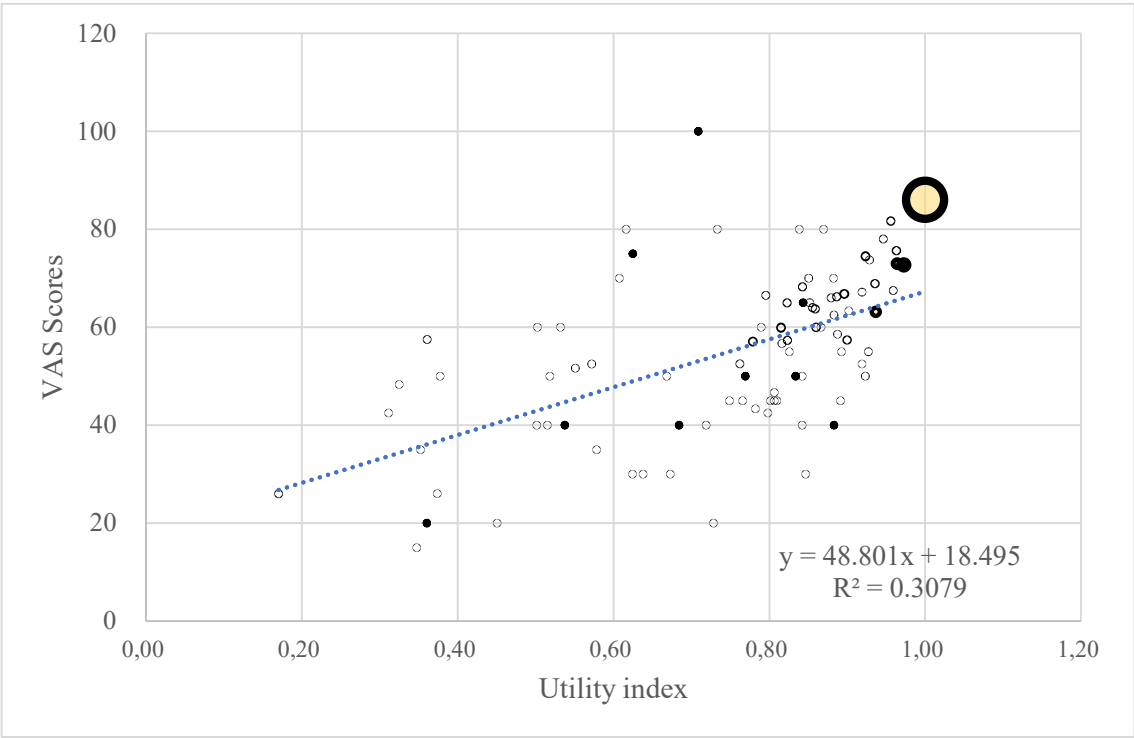

Figure S6 Correlation between EQ-5D-3L VAS scores and utility index in 45-54 years age (r=0.3620, P<0.05).

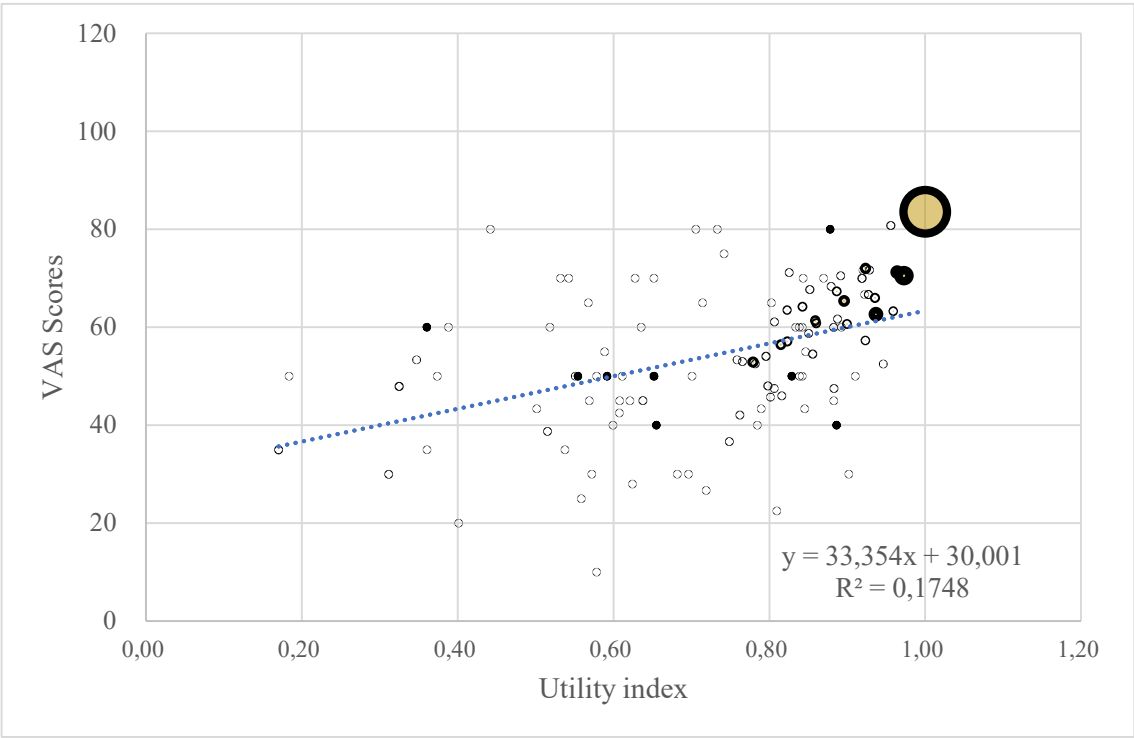

Figure S7 Correlation between EQ-5D-3L VAS scores and utility index in 55-64 years age (r=0.4225, P<0.05).

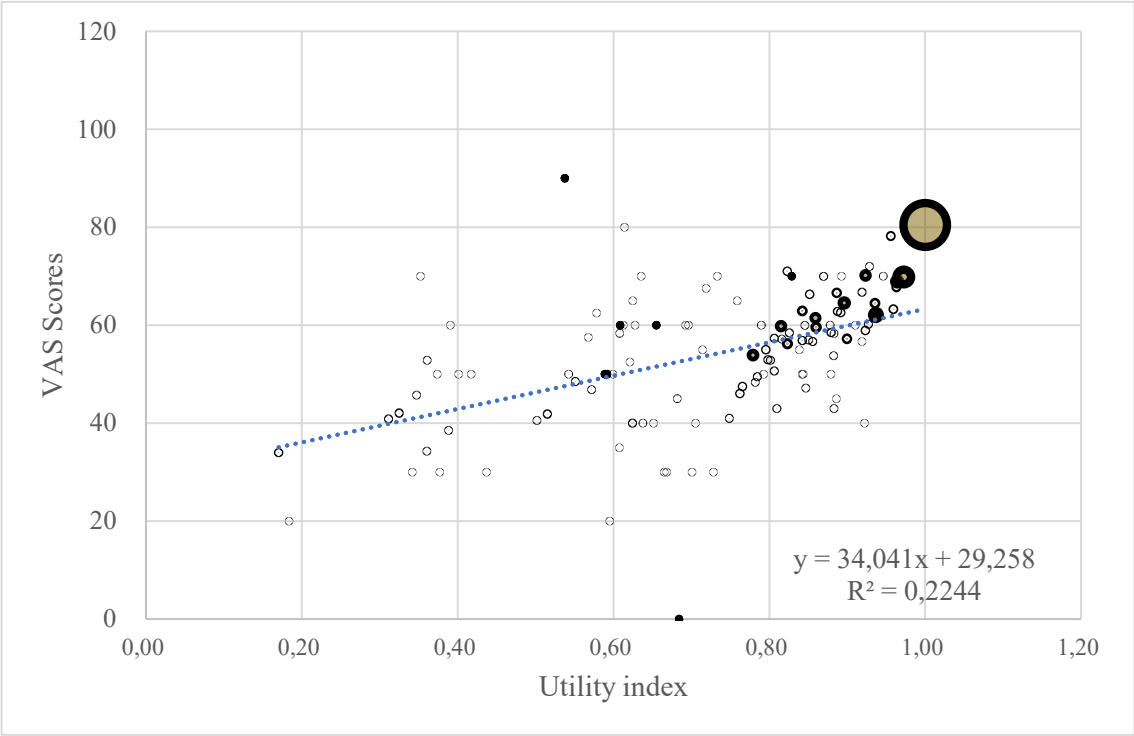

Figure S8 Correlation between EQ-5D-3L VAS scores and utility index in 65-74 years age (r=0.4564, P<0.05).

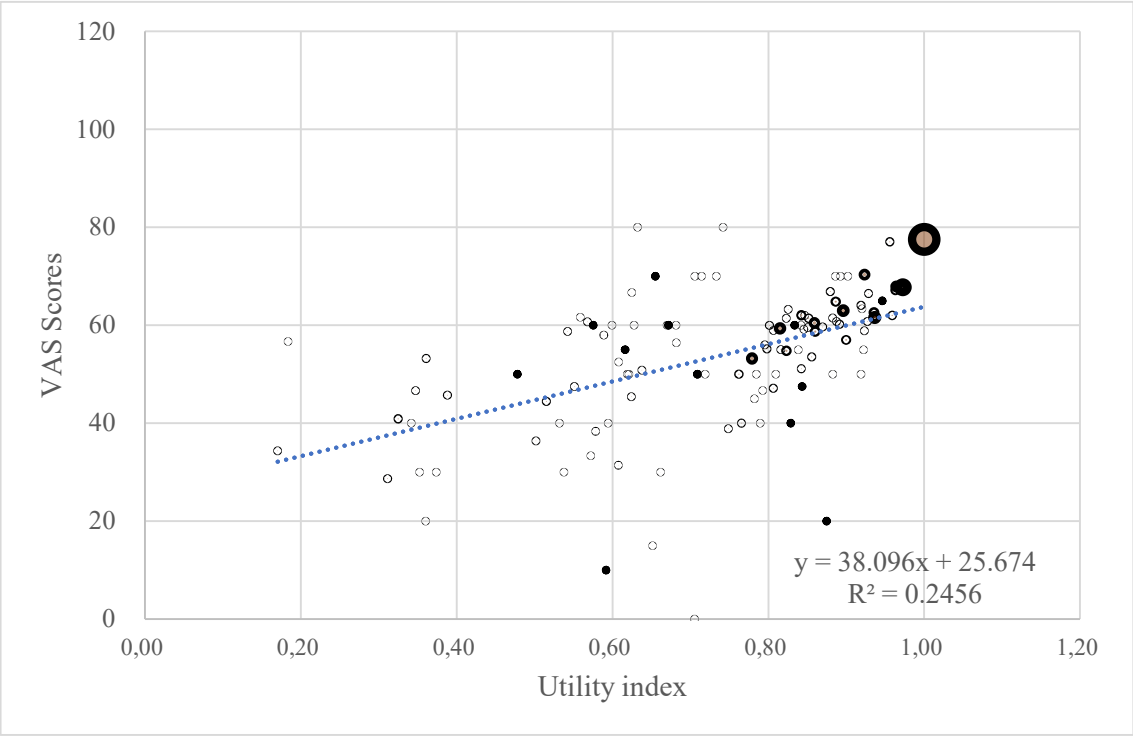



Figure S9 Correlation between EQ-5D-3L VAS scores and utility index in 75 and above years age ( $r=0.4564$ ,  $P<0.05$ ).

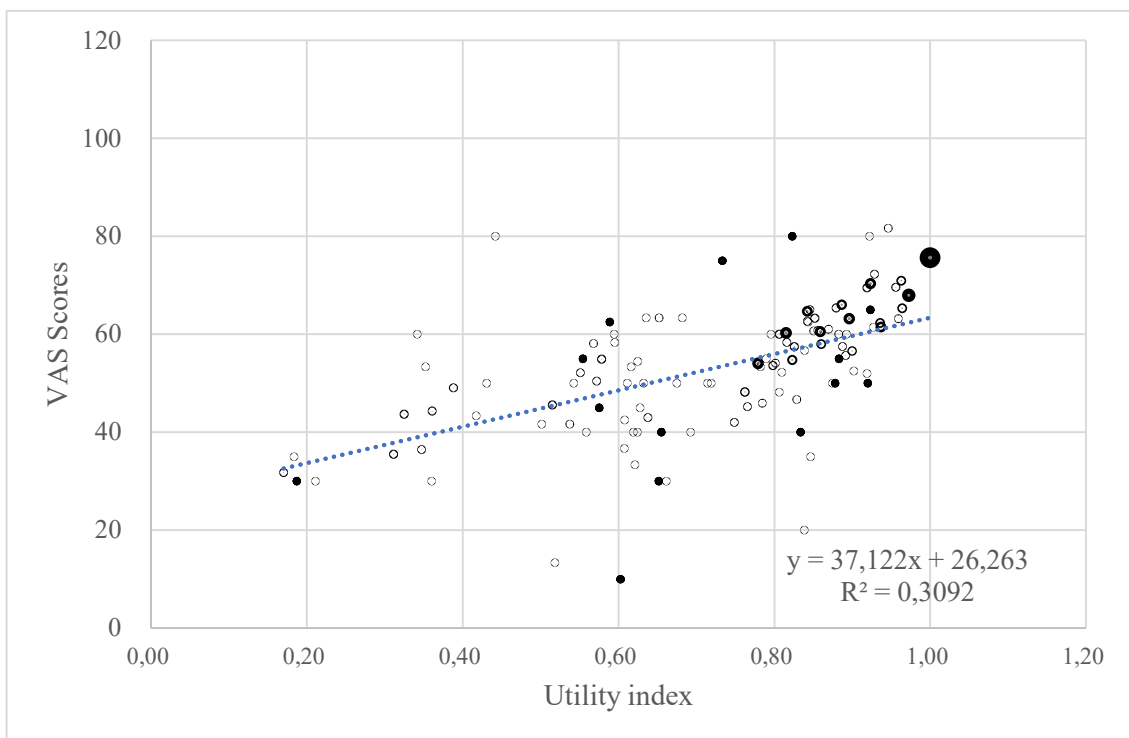

## Tables

**Table S1 Distribution of EQ-5D-3L health states in Chinese population (n=188720)**

|       | Utility index score | Frequency | Percentage (%) | Cumulative percentage (%) |
|-------|---------------------|-----------|----------------|---------------------------|
| 33333 | 0.17                | 93        | 0.05           | 0.05                      |
| 33332 | 0.31                | 79        | 0.04           | 0.09                      |
| 33331 | 0.35                | 40        | 0.02           | 0.11                      |
| 33323 | 0.18                | 10        | 0.01           | 0.12                      |
| 33322 | 0.33                | 116       | 0.06           | 0.18                      |
| 33321 | 0.36                | 59        | 0.03           | 0.21                      |
| 33313 | 0.21                | 2         | 0.00           | 0.21                      |
| 33312 | 0.35                | 7         | 0.00           | 0.22                      |
| 33311 | 0.39                | 52        | 0.03           | 0.24                      |
| 33233 | 0.19                | 1         | 0.00           | 0.24                      |
| 33222 | 0.34                | 4         | 0.00           | 0.25                      |
| 33221 | 0.38                | 1         | 0.00           | 0.25                      |
| 33111 | 0.44                | 3         | 0.00           | 0.25                      |
| 32333 | 0.42                | 4         | 0.00           | 0.25                      |
| 32332 | 0.56                | 8         | 0.00           | 0.25                      |
| 32331 | 0.59                | 3         | 0.00           | 0.26                      |
| 32323 | 0.43                | 2         | 0.00           | 0.26                      |
| 32322 | 0.57                | 29        | 0.02           | 0.27                      |
| 32321 | 0.61                | 25        | 0.01           | 0.29                      |
| 32312 | 0.60                | 3         | 0.00           | 0.29                      |
| 32311 | 0.64                | 7         | 0.00           | 0.29                      |
| 32232 | 0.58                | 3         | 0.00           | 0.29                      |
| 32231 | 0.61                | 2         | 0.00           | 0.29                      |
| 32222 | 0.59                | 11        | 0.01           | 0.30                      |
| 32221 | 0.63                | 16        | 0.01           | 0.31                      |
| 32211 | 0.65                | 7         | 0.00           | 0.31                      |
| 32132 | 0.61                | 2         | 0.00           | 0.31                      |
| 32121 | 0.66                | 1         | 0.00           | 0.31                      |
| 31332 | 0.60                | 1         | 0.00           | 0.31                      |
| 31322 | 0.62                | 5         | 0.00           | 0.32                      |
| 31321 | 0.65                | 2         | 0.00           | 0.32                      |
| 31313 | 0.50                | 1         | 0.00           | 0.32                      |
| 31211 | 0.70                | 2         | 0.00           | 0.32                      |
| 31122 | 0.67                | 1         | 0.00           | 0.32                      |
| 31121 | 0.71                | 2         | 0.00           | 0.32                      |
| 31111 | 0.73                | 15        | 0.01           | 0.33                      |
| 23333 | 0.36                | 19        | 0.01           | 0.34                      |
| 23332 | 0.50                | 33        | 0.02           | 0.36                      |
| 23331 | 0.54                | 13        | 0.01           | 0.36                      |
| 23323 | 0.37                | 7         | 0.00           | 0.37                      |
| 23322 | 0.52                | 72        | 0.04           | 0.40                      |
| 23321 | 0.55                | 61        | 0.03           | 0.44                      |
| 23313 | 0.40                | 2         | 0.00           | 0.44                      |
| 23312 | 0.54                | 18        | 0.01           | 0.45                      |
| 23311 | 0.58                | 38        | 0.02           | 0.47                      |
| 23233 | 0.38                | 2         | 0.00           | 0.47                      |
| 23232 | 0.52                | 7         | 0.00           | 0.47                      |
| 23231 | 0.55                | 3         | 0.00           | 0.47                      |
| 23223 | 0.39                | 1         | 0.00           | 0.47                      |
| 23222 | 0.53                | 3         | 0.00           | 0.48                      |
| 23221 | 0.57                | 18        | 0.01           | 0.49                      |
| 23212 | 0.56                | 1         | 0.00           | 0.49                      |
| 23211 | 0.60                | 8         | 0.00           | 0.49                      |

|       |      |      |      |      |
|-------|------|------|------|------|
| 23122 | 0.57 | 3    | 0.00 | 0.49 |
| 23111 | 0.63 | 3    | 0.00 | 0.49 |
| 22333 | 0.61 | 18   | 0.01 | 0.50 |
| 22332 | 0.75 | 42   | 0.02 | 0.53 |
| 22331 | 0.79 | 25   | 0.01 | 0.54 |
| 22323 | 0.62 | 12   | 0.01 | 0.54 |
| 22322 | 0.76 | 127  | 0.07 | 0.61 |
| 22321 | 0.80 | 109  | 0.06 | 0.67 |
| 22312 | 0.79 | 15   | 0.01 | 0.68 |
| 22311 | 0.83 | 75   | 0.04 | 0.72 |
| 22233 | 0.62 | 41   | 0.02 | 0.74 |
| 22232 | 0.77 | 75   | 0.04 | 0.78 |
| 22231 | 0.80 | 39   | 0.02 | 0.80 |
| 22223 | 0.64 | 27   | 0.01 | 0.81 |
| 22222 | 0.78 | 1431 | 0.76 | 1.57 |
| 22221 | 0.82 | 1372 | 0.73 | 2.30 |
| 22212 | 0.81 | 74   | 0.04 | 2.34 |
| 22211 | 0.84 | 518  | 0.27 | 2.61 |
| 22133 | 0.66 | 1    | 0.00 | 2.61 |
| 22132 | 0.80 | 1    | 0.00 | 2.61 |
| 22131 | 0.84 | 7    | 0.00 | 2.62 |
| 22123 | 0.68 | 1    | 0.00 | 2.62 |
| 22122 | 0.82 | 39   | 0.02 | 2.64 |
| 22121 | 0.85 | 118  | 0.06 | 2.70 |
| 22112 | 0.84 | 13   | 0.01 | 2.71 |
| 22111 | 0.88 | 85   | 0.05 | 2.75 |
| 21333 | 0.65 | 5    | 0.00 | 2.76 |
| 21332 | 0.79 | 5    | 0.00 | 2.76 |
| 21331 | 0.83 | 10   | 0.01 | 2.76 |
| 21323 | 0.67 | 2    | 0.00 | 2.76 |
| 21322 | 0.81 | 48   | 0.03 | 2.79 |
| 21321 | 0.84 | 68   | 0.04 | 2.83 |
| 21313 | 0.69 | 2    | 0.00 | 2.83 |
| 21312 | 0.83 | 5    | 0.00 | 2.83 |
| 21311 | 0.87 | 46   | 0.02 | 2.85 |
| 21233 | 0.67 | 2    | 0.00 | 2.86 |
| 21232 | 0.81 | 27   | 0.01 | 2.87 |
| 21231 | 0.85 | 25   | 0.01 | 2.88 |
| 21223 | 0.68 | 17   | 0.01 | 2.89 |
| 21222 | 0.82 | 497  | 0.26 | 3.16 |
| 21221 | 0.86 | 961  | 0.51 | 3.66 |
| 21213 | 0.71 | 1    | 0.00 | 3.67 |
| 21212 | 0.85 | 49   | 0.03 | 3.69 |
| 21211 | 0.89 | 456  | 0.24 | 3.93 |
| 21133 | 0.71 | 2    | 0.00 | 3.93 |
| 21132 | 0.85 | 18   | 0.01 | 3.94 |
| 21131 | 0.88 | 38   | 0.02 | 3.96 |
| 21123 | 0.72 | 10   | 0.01 | 3.97 |
| 21122 | 0.86 | 492  | 0.26 | 4.23 |
| 21121 | 0.90 | 1716 | 0.91 | 5.14 |
| 21112 | 0.89 | 63   | 0.03 | 5.17 |
| 21111 | 0.92 | 1292 | 0.68 | 5.86 |
| 13333 | 0.44 | 2    | 0.00 | 5.86 |
| 13332 | 0.58 | 1    | 0.00 | 5.86 |
| 13331 | 0.61 | 1    | 0.00 | 5.86 |
| 13323 | 0.45 | 1    | 0.00 | 5.86 |
| 13322 | 0.59 | 3    | 0.00 | 5.86 |

|       |      |        |       |        |
|-------|------|--------|-------|--------|
| 13321 | 0.63 | 5      | 0.00  | 5.86   |
| 13313 | 0.48 | 1      | 0.00  | 5.86   |
| 13312 | 0.62 | 2      | 0.00  | 5.87   |
| 13311 | 0.66 | 5      | 0.00  | 5.87   |
| 13222 | 0.61 | 1      | 0.00  | 5.87   |
| 13211 | 0.67 | 1      | 0.00  | 5.87   |
| 13121 | 0.68 | 1      | 0.00  | 5.87   |
| 13112 | 0.67 | 1      | 0.00  | 5.87   |
| 13111 | 0.71 | 3      | 0.00  | 5.87   |
| 12333 | 0.68 | 2      | 0.00  | 5.87   |
| 12322 | 0.84 | 5      | 0.00  | 5.88   |
| 12321 | 0.88 | 5      | 0.00  | 5.88   |
| 12312 | 0.87 | 1      | 0.00  | 5.88   |
| 12311 | 0.90 | 10     | 0.01  | 5.88   |
| 12233 | 0.70 | 2      | 0.00  | 5.88   |
| 12232 | 0.84 | 6      | 0.00  | 5.89   |
| 12231 | 0.88 | 4      | 0.00  | 5.89   |
| 12223 | 0.71 | 7      | 0.00  | 5.89   |
| 12222 | 0.86 | 89     | 0.05  | 5.94   |
| 12221 | 0.89 | 91     | 0.05  | 5.99   |
| 12213 | 0.74 | 2      | 0.00  | 5.99   |
| 12212 | 0.88 | 11     | 0.01  | 6.00   |
| 12211 | 0.92 | 94     | 0.05  | 6.05   |
| 12132 | 0.88 | 1      | 0.00  | 6.05   |
| 12122 | 0.89 | 14     | 0.01  | 6.05   |
| 12121 | 0.93 | 62     | 0.03  | 6.09   |
| 12112 | 0.92 | 7      | 0.00  | 6.09   |
| 12111 | 0.96 | 157    | 0.08  | 6.17   |
| 11333 | 0.73 | 2      | 0.00  | 6.17   |
| 11331 | 0.91 | 1      | 0.00  | 6.18   |
| 11322 | 0.88 | 12     | 0.01  | 6.18   |
| 11321 | 0.92 | 16     | 0.01  | 6.19   |
| 11313 | 0.77 | 2      | 0.00  | 6.19   |
| 11312 | 0.91 | 4      | 0.00  | 6.19   |
| 11311 | 0.95 | 24     | 0.01  | 6.21   |
| 11232 | 0.89 | 6      | 0.00  | 6.21   |
| 11231 | 0.92 | 8      | 0.00  | 6.21   |
| 11223 | 0.76 | 8      | 0.00  | 6.22   |
| 11222 | 0.90 | 302    | 0.16  | 6.38   |
| 11221 | 0.94 | 474    | 0.25  | 6.63   |
| 11212 | 0.93 | 57     | 0.03  | 6.66   |
| 11211 | 0.96 | 359    | 0.19  | 6.85   |
| 11133 | 0.78 | 23     | 0.01  | 6.86   |
| 11132 | 0.92 | 63     | 0.03  | 6.89   |
| 11131 | 0.96 | 156    | 0.08  | 6.98   |
| 11123 | 0.80 | 65     | 0.03  | 7.01   |
| 11122 | 0.94 | 3102   | 1.64  | 8.66   |
| 11121 | 0.97 | 11069  | 5.87  | 14.52  |
| 11113 | 0.82 | 89     | 0.05  | 14.57  |
| 11112 | 0.96 | 2347   | 1.24  | 15.81  |
| 11111 | 1.00 | 158880 | 84.19 | 100.00 |

Table S2 EQ-5D-3L utility index and VAS scores (Median and Interquartile Range IQR) by socio-demographic characteristics of respondents

| Characteristics of respondents | n     | %     | VAS score |                |             |        | Utility index |                |             |        |
|--------------------------------|-------|-------|-----------|----------------|-------------|--------|---------------|----------------|-------------|--------|
|                                |       |       | Median    | IQR (Q1, Q3)*  | Z/ $\chi^2$ | P      | Median        | IQR (Q1, Q3)   | Z/ $\chi^2$ | P      |
| <b>Demographic</b>             |       |       |           |                |             |        |               |                |             |        |
| Gender                         |       |       |           |                |             |        |               |                |             |        |
| Male                           | 89830 | 47.60 | 80.00     | (80.00, 90.00) | 20.58       | <0.001 | 1.000         | (1.000, 1.000) | 16.73       | <0.001 |
| Female                         | 98890 | 52.40 | 80.00     | (70.00, 90.00) |             |        | 1.000         | (1.000, 1.000) |             |        |
| Age                            |       |       |           |                |             |        |               |                |             |        |
| 15-24                          | 14094 | 7.47  | 90.00     | (90.00, 96.00) | 39020.08    | <0.001 | 1.000         | (1.000, 1.000) | 20166.43    | <0.001 |
| 25-34                          | 24347 | 12.90 | 90.00     | (80.00, 90.00) |             |        | 1.000         | (1.000, 1.000) |             |        |
| 35-44                          | 35081 | 18.59 | 90.00     | (80.00, 90.00) |             |        | 1.000         | (1.000, 1.000) |             |        |
| 45-54                          | 41000 | 21.73 | 80.00     | (80.00, 90.00) |             |        | 1.000         | (1.000, 1.000) |             |        |
| 55-64                          | 40532 | 21.48 | 80.00     | (70.00, 90.00) |             |        | 1.000         | (1.000, 1.000) |             |        |
| 65-74                          | 22138 | 11.73 | 75.00     | (60.00, 80.00) |             |        | 1.000         | (0.973, 1.000) |             |        |
| 75+                            | 11528 | 6.11  | 70.00     | (60.00, 80.00) |             |        | 1.000         | (0.896, 1.000) |             |        |
| <b>Residency</b>               |       |       |           |                |             |        |               |                |             |        |
| Location                       |       |       |           |                |             |        |               |                |             |        |
| Urban                          | 94064 | 49.84 | 80.00     | (70.00, 90.00) | -12.18      | <0.001 | 1.000         | (1.000, 1.000) | 0.29        | 0.774  |
| Rural                          | 94656 | 50.16 | 80.00     | (75.00, 90.00) |             |        | 1.000         | (1.000, 1.000) |             |        |
| Region                         |       |       |           |                |             |        |               |                |             |        |
| Eastern                        | 66575 | 35.28 | 85.00     | (80.00, 90.00) | 870.89      | <0.001 | 1.000         | (1.000, 1.000) | 218.20      | <0.001 |
| Central                        | 58306 | 30.90 | 80.00     | (70.00, 90.00) |             |        | 1.000         | (1.000, 1.000) |             |        |
| Western                        | 63839 | 33.83 | 80.00     | (70.00, 90.00) |             |        | 1.000         | (1.000, 1.000) |             |        |
| <b>Socio-economic</b>          |       |       |           |                |             |        |               |                |             |        |
| Educational attainment         |       |       |           |                |             |        |               |                |             |        |
| Illiterate                     | 22709 | 12.03 | 80.00     | (60.00, 80.00) | 14357.72    | <0.001 | 1.000         | (0.973, 1.000) | 9053.04     | <0.001 |
| Primary school                 | 48953 | 25.94 | 80.00     | (70.00, 90.00) |             |        | 1.000         | (1.000, 1.000) |             |        |
| Junior middle school           | 65877 | 34.91 | 89.00     | (80.00, 90.00) |             |        | 1.000         | (1.000, 1.000) |             |        |
| Senior middle school           | 32435 | 17.19 | 90.00     | (80.00, 90.00) |             |        | 1.000         | (1.000, 1.000) |             |        |
| University/college or above    | 18746 | 9.93  | 90.00     | (80.00, 90.00) |             |        | 1.000         | (1.000, 1.000) |             |        |

|                                           |                           |        |       |       |                |          |        |       |                |         |        |
|-------------------------------------------|---------------------------|--------|-------|-------|----------------|----------|--------|-------|----------------|---------|--------|
| Local ranking of average household income |                           |        |       |       |                |          |        |       |                |         |        |
|                                           | Lowest (<percentile 20)   | 35702  | 18.93 | 80.00 | (70.00, 90.00) |          |        | 1.000 | (1.000, 1.000) |         |        |
|                                           | Low (percentile 20-39)    | 35471  | 18.80 | 80.00 | (70.00, 90.00) |          |        | 1.000 | (1.000, 1.000) |         |        |
|                                           | Middle (percentile 40-59) | 37124  | 19.68 | 80.00 | (80.00, 90.00) | 2313.12  | <0.001 | 1.000 | (1.000, 1.000) | 2113.31 | <0.001 |
|                                           | High (percentile 60-79)   | 39084  | 20.72 | 85.00 | (80.00, 90.00) |          |        | 1.000 | (1.000, 1.000) |         |        |
|                                           | Highest (>=percentile 80) | 41251  | 21.87 | 85.00 | (80.00, 90.00) |          |        | 1.000 | (1.000, 1.000) |         |        |
| Employment                                |                           |        |       |       |                |          |        |       |                |         |        |
|                                           | Employed                  | 127614 | 67.62 | 85.00 | (80.00, 90.00) |          |        | 1.000 | (1.000, 1.000) |         |        |
|                                           | Retired                   | 27274  | 14.45 | 80.00 | (70.00, 85.00) | 15565.41 | <0.001 | 1.000 | (1.000, 1.000) | 9099.38 | <0.001 |
|                                           | Student                   | 4747   | 2.52  | 90.00 | (90.00, 98.00) |          |        | 1.000 | (1.000, 1.000) |         |        |
|                                           | Unemployed                | 29085  | 15.41 | 80.00 | (65.00, 90.00) |          |        | 1.000 | (0.937, 1.000) |         |        |
| Marital status                            |                           |        |       |       |                |          |        |       |                |         |        |
|                                           | Never married/Single      | 17131  | 9.08  | 90.00 | (85.00, 95.00) |          |        | 1.000 | (1.000, 1.000) |         |        |
|                                           | Married                   | 155755 | 82.53 | 80.00 | (75.00, 90.00) | 12270.47 | <0.001 | 1.000 | (1.000, 1.000) | 6859.82 | <0.001 |
|                                           | Widowed                   | 12932  | 6.85  | 70.00 | (60.00, 80.00) |          |        | 1.000 | (0.937, 1.000) |         |        |
|                                           | Divorced                  | 2898   | 1.54  | 80.00 | (70.00, 90.00) |          |        | 1.000 | (1.000, 1.000) |         |        |
| <b>Illness condition</b>                  |                           |        |       |       |                |          |        |       |                |         |        |
| Two-week morbidity                        |                           |        |       |       |                |          |        |       |                |         |        |
|                                           | Yes                       | 44986  | 23.84 | 75.00 | (60.00, 80.00) | -139.95  | <0.001 | 1.000 | (0.973, 1.000) | -127.24 | <0.001 |
|                                           | No                        | 143734 | 76.16 | 90.00 | (80.00, 90.00) |          |        | 1.000 | (1.000, 1.000) |         |        |
| Chronic disease                           |                           |        |       |       |                |          |        |       |                |         |        |
|                                           | Yes                       | 50698  | 26.86 | 75.00 | (60.00, 80.00) | -160.43  | <0.001 | 1.000 | (0.973, 1.000) | -138.90 | <0.001 |
|                                           | No                        | 138022 | 73.14 | 90.00 | (80.00, 90.00) |          |        | 1.000 | (1.000, 1.000) |         |        |
| One-year hospital admission               |                           |        |       |       |                |          |        |       |                |         |        |
|                                           | Yes                       | 17016  | 9.02  | 80.00 | (60.00, 90.00) | -68.07   | <0.001 | 1.000 | (0.973, 1.000) | -74.53  | <0.001 |
|                                           | No                        | 171681 | 90.98 | 80.00 | (80.00, 90.00) |          |        | 1.000 | (1.000, 1.000) |         |        |
| <b>Lifestyle and behaviors</b>            |                           |        |       |       |                |          |        |       |                |         |        |
| Smoking                                   |                           |        |       |       |                |          |        |       |                |         |        |
|                                           | Yes                       | 49208  | 26.09 | 80.00 | (80.00, 90.00) | 10.18    | <0.001 | 1.000 | (1.000, 1.000) | 14.92   | <0.001 |
|                                           | No                        | 139399 | 73.91 | 80.00 | (70.00, 90.00) |          |        | 1.000 | (1.000, 1.000) |         |        |
| Drinking                                  |                           |        |       |       |                |          |        |       |                |         |        |

|                   |     |        |        |       |                |       |        |       |                |       |        |
|-------------------|-----|--------|--------|-------|----------------|-------|--------|-------|----------------|-------|--------|
|                   | Yes | 44005  | 23.32  | 85.00 | (80.00, 90.00) |       |        | 1.000 | (1.000, 1.000) |       |        |
|                   | No  | 144706 | 76.68  | 80.00 | (70.00, 90.00) | 19.55 | <0.001 | 1.000 | (1.000, 1.000) | 19.63 | <0.001 |
| Physical exercise |     |        |        |       |                |       |        |       |                |       |        |
|                   | Yes | 55843  | 29.67  | 80.00 | (70.00, 90.00) |       |        | 1.000 | (1.000, 1.000) |       |        |
|                   | No  | 132372 | 70.33  | 80.00 | (70.00, 90.00) | -5.67 | <0.001 | 1.000 | (1.000, 1.000) | 8.98  | <0.001 |
| <b>Total</b>      |     | 188720 | 100.00 | 80.00 | (70.00, 90.00) | —     | —      | 1.000 | (1.000, 1.000) | —     | —      |

\*Note: Q1 indicates the 25th percentiles and Q3 indicates the 75th percentiles. Wilcoxon (Mann-Whitney) rank-sum test for two sample (Z), and Kruskal-Wallis equality-of-populations rank test for three and above samples ( $\chi^2$ ).

**Table S3 VAS scores (Mean, SD) of respondents by gender and age**

|         |       | Urban   |       |         |       |         |       |       |       | Rural   |       |         |       |         |       |       |       | Total   |       |         |       |         |       |       |       |
|---------|-------|---------|-------|---------|-------|---------|-------|-------|-------|---------|-------|---------|-------|---------|-------|-------|-------|---------|-------|---------|-------|---------|-------|-------|-------|
|         |       | Eastern |       | Central |       | Western |       | Total |       | Eastern |       | Central |       | Western |       | Total |       | Eastern |       | Central |       | Western |       | Total |       |
|         |       | Mean    | SD    | Mean    | SD    | Mean    | SD    | Mean  | SD    | Mean    | SD    | Mean    | SD    | Mean    | SD    | Mean  | SD    | Mean    | SD    | Mean    | SD    | Mean    | SD    | Mean  | SD    |
| All     | Total | 81.94   | 13.28 | 80.58   | 13.86 | 79.11   | 14.08 | 80.59 | 13.78 | 82.31   | 13.22 | 80.59   | 14.12 | 80.71   | 13.76 | 81.23 | 13.71 | 82.12   | 13.25 | 80.59   | 13.99 | 79.94   | 13.94 | 80.91 | 13.74 |
|         | 15-24 | 91.48   | 7.96  | 91.13   | 8.10  | 88.58   | 9.25  | 90.36 | 8.58  | 91.60   | 7.66  | 90.75   | 8.38  | 89.48   | 8.21  | 90.43 | 8.14  | 91.53   | 7.82  | 90.94   | 8.24  | 89.10   | 8.67  | 90.40 | 8.35  |
|         | 25-34 | 88.42   | 9.11  | 88.23   | 9.15  | 86.31   | 9.68  | 87.70 | 9.35  | 89.43   | 8.81  | 88.51   | 9.91  | 87.38   | 9.49  | 88.37 | 9.42  | 88.85   | 9.00  | 88.35   | 9.49  | 86.86   | 9.60  | 88.01 | 9.39  |
|         | 35-44 | 85.59   | 10.89 | 84.60   | 11.50 | 82.48   | 12.16 | 84.14 | 11.63 | 86.35   | 10.44 | 85.16   | 11.36 | 84.29   | 11.12 | 85.20 | 11.03 | 85.98   | 10.67 | 84.88   | 11.43 | 83.43   | 11.66 | 84.68 | 11.34 |
|         | 45-54 | 82.05   | 12.48 | 80.66   | 13.55 | 79.16   | 13.18 | 80.61 | 13.13 | 83.50   | 11.84 | 81.40   | 13.00 | 80.85   | 12.61 | 81.97 | 12.52 | 82.86   | 12.14 | 81.05   | 13.27 | 80.06   | 12.90 | 81.35 | 12.82 |
|         | 55-64 | 78.89   | 12.89 | 76.83   | 13.48 | 75.42   | 13.91 | 77.21 | 13.46 | 79.21   | 12.99 | 76.65   | 13.84 | 76.00   | 13.95 | 77.37 | 13.65 | 79.05   | 12.94 | 76.74   | 13.67 | 75.72   | 13.93 | 77.29 | 13.56 |
|         | 65-74 | 75.82   | 14.12 | 73.14   | 13.98 | 71.10   | 14.62 | 73.49 | 14.36 | 74.61   | 13.74 | 72.10   | 14.62 | 70.99   | 14.90 | 72.63 | 14.49 | 75.26   | 13.96 | 72.66   | 14.29 | 71.05   | 14.76 | 73.08 | 14.43 |
|         | 75+   | 71.39   | 15.15 | 69.91   | 14.76 | 67.86   | 15.49 | 69.88 | 15.21 | 69.14   | 15.21 | 67.77   | 15.52 | 66.38   | 15.40 | 67.95 | 15.39 | 70.40   | 15.22 | 68.98   | 15.13 | 67.24   | 15.47 | 69.05 | 15.32 |
| Males   | Total | 82.56   | 13.06 | 80.94   | 13.90 | 79.92   | 13.90 | 81.20 | 13.64 | 82.95   | 12.93 | 81.06   | 13.90 | 81.61   | 13.38 | 81.90 | 13.41 | 82.75   | 13.00 | 81.00   | 13.90 | 80.82   | 13.65 | 81.56 | 13.53 |
|         | 15-24 | 91.95   | 7.80  | 91.54   | 8.41  | 89.25   | 8.91  | 90.90 | 8.45  | 92.06   | 7.47  | 91.28   | 7.92  | 89.74   | 8.25  | 90.78 | 8.02  | 92.00   | 7.65  | 91.41   | 8.17  | 89.55   | 8.52  | 90.84 | 8.22  |
|         | 25-34 | 88.83   | 8.82  | 88.53   | 9.28  | 86.92   | 9.49  | 88.16 | 9.20  | 89.80   | 8.88  | 88.68   | 10.14 | 88.02   | 9.33  | 88.78 | 9.43  | 89.24   | 8.86  | 88.60   | 9.67  | 87.52   | 9.42  | 88.45 | 9.31  |
|         | 35-44 | 85.81   | 10.78 | 85.00   | 11.48 | 83.24   | 12.00 | 84.62 | 11.50 | 86.86   | 10.25 | 85.62   | 11.34 | 85.03   | 10.76 | 85.77 | 10.82 | 86.33   | 10.53 | 85.31   | 11.41 | 84.18   | 11.40 | 85.20 | 11.18 |
|         | 45-54 | 82.54   | 12.62 | 80.93   | 13.65 | 80.34   | 12.93 | 81.28 | 13.10 | 84.24   | 11.75 | 82.19   | 12.67 | 81.98   | 12.27 | 82.85 | 12.26 | 83.50   | 12.17 | 81.60   | 13.15 | 81.25   | 12.59 | 82.15 | 12.66 |
|         | 55-64 | 79.63   | 12.78 | 77.35   | 13.82 | 76.67   | 13.39 | 78.04 | 13.35 | 80.24   | 12.62 | 77.43   | 13.62 | 77.66   | 13.21 | 78.52 | 13.20 | 79.94   | 12.70 | 77.40   | 13.72 | 77.20   | 13.30 | 78.29 | 13.27 |
|         | 65-74 | 76.41   | 13.96 | 74.10   | 13.74 | 72.03   | 14.66 | 74.29 | 14.23 | 75.57   | 13.42 | 73.22   | 14.26 | 72.12   | 14.76 | 73.69 | 14.21 | 76.00   | 13.71 | 73.67   | 14.00 | 72.07   | 14.71 | 73.99 | 14.22 |
|         | 75+   | 72.95   | 14.86 | 71.18   | 14.86 | 68.93   | 15.87 | 71.15 | 15.26 | 70.69   | 14.78 | 69.43   | 15.43 | 67.59   | 15.79 | 69.40 | 15.33 | 71.92   | 14.86 | 70.42   | 15.13 | 68.37   | 15.84 | 70.38 | 15.31 |
| Females | Total | 81.39   | 13.44 | 80.28   | 13.82 | 78.41   | 14.21 | 80.07 | 13.87 | 81.73   | 13.45 | 80.16   | 14.30 | 79.82   | 14.06 | 80.59 | 13.95 | 81.55   | 13.44 | 80.22   | 14.05 | 79.12   | 14.15 | 80.32 | 13.91 |
|         | 15-24 | 91.04   | 8.09  | 90.79   | 7.82  | 87.99   | 9.50  | 89.89 | 8.66  | 91.17   | 7.81  | 90.29   | 8.74  | 89.21   | 8.16  | 90.09 | 8.25  | 91.10   | 7.96  | 90.55   | 8.29  | 88.67   | 8.79  | 89.99 | 8.45  |
|         | 25-34 | 88.07   | 9.34  | 88.01   | 9.05  | 85.85   | 9.81  | 87.34 | 9.46  | 89.12   | 8.74  | 88.36   | 9.72  | 86.77   | 9.61  | 88.02 | 9.40  | 88.52   | 9.10  | 88.16   | 9.34  | 86.30   | 9.72  | 87.64 | 9.44  |
|         | 35-44 | 85.39   | 10.98 | 84.24   | 11.51 | 81.80   | 12.26 | 83.71 | 11.72 | 85.92   | 10.58 | 84.77   | 11.37 | 83.62   | 11.40 | 84.70 | 11.18 | 85.66   | 10.78 | 84.51   | 11.44 | 82.75   | 11.85 | 84.22 | 11.46 |
|         | 45-54 | 81.62   | 12.33 | 80.44   | 13.48 | 78.18   | 13.31 | 80.06 | 13.13 | 82.82   | 11.87 | 80.70   | 13.25 | 79.77   | 12.83 | 81.16 | 12.70 | 82.28   | 12.09 | 80.58   | 13.36 | 79.00   | 13.09 | 80.64 | 12.91 |
|         | 55-64 | 78.23   | 12.96 | 76.38   | 13.17 | 74.29   | 14.27 | 76.48 | 13.52 | 78.19   | 13.27 | 75.92   | 14.01 | 74.31   | 14.48 | 76.24 | 13.99 | 78.21   | 13.11 | 76.15   | 13.60 | 74.30   | 14.37 | 76.36 | 13.75 |
|         | 65-74 | 75.25   | 14.24 | 72.27   | 14.14 | 70.21   | 14.53 | 72.73 | 14.45 | 73.56   | 14.02 | 70.83   | 14.92 | 69.71   | 14.96 | 71.44 | 14.71 | 74.50   | 14.17 | 71.64   | 14.50 | 69.97   | 14.73 | 72.15 | 14.58 |
|         | 75+   | 70.15   | 15.27 | 68.59   | 14.54 | 66.84   | 15.07 | 68.73 | 15.07 | 67.75   | 15.45 | 66.00   | 15.42 | 65.19   | 14.93 | 66.53 | 15.33 | 69.12   | 15.39 | 67.48   | 14.98 | 66.17   | 15.03 | 67.80 | 15.22 |



**Table S4 VAS scores (Median and Interquartile Range IQR) of respondents by gender and age**

|                          |       | Eastern |                 | Central |                 | Western |                | Total |                |
|--------------------------|-------|---------|-----------------|---------|-----------------|---------|----------------|-------|----------------|
|                          |       | Mean    | IQR (Q1, Q3)    | Mean    | IQR (Q1, Q3)    | Mean    | IQR (Q1, Q3)   | Mean  | IQR (Q1, Q3)   |
| <b>Urban &amp; rural</b> |       |         |                 |         |                 |         |                |       |                |
| All                      | Total | 85.00   | (80.00, 90.00)  | 80.00   | (70.00, 90.00)  | 80.00   | (70.00, 90.00) | 80.00 | (70.00, 90.00) |
|                          | 15-24 | 90.00   | (90.00, 100.00) | 90.00   | (90.00, 100.00) | 90.00   | (90.00, 95.00) | 90.00 | (90.00, 96.00) |
|                          | 25-34 | 90.00   | (85.00, 95.00)  | 90.00   | (80.00, 90.00)  | 90.00   | (80.00, 90.00) | 90.00 | (80.00, 90.00) |
|                          | 35-44 | 90.00   | (80.00, 90.00)  | 90.00   | (80.00, 90.00)  | 90.00   | (80.00, 90.00) | 90.00 | (80.00, 90.00) |
|                          | 45-54 | 85.00   | (80.00, 90.00)  | 80.00   | (80.00, 90.00)  | 80.00   | (70.00, 90.00) | 80.00 | (80.00, 90.00) |
|                          | 55-64 | 80.00   | (70.00, 90.00)  | 80.00   | (70.00, 90.00)  | 80.00   | (70.00, 85.00) | 80.00 | (70.00, 90.00) |
|                          | 65-74 | 80.00   | (70.00, 85.00)  | 75.00   | (60.00, 80.00)  | 70.00   | (60.00, 80.00) | 75.00 | (60.00, 80.00) |
|                          | 75+   | 70.00   | (60.00, 80.00)  | 70.00   | (60.00, 80.00)  | 70.00   | (60.00, 80.00) | 70.00 | (60.00, 80.00) |
| Males                    | Total | 85.00   | (80.00, 90.00)  | 80.00   | (70.00, 90.00)  | 80.00   | (70.00, 90.00) | 80.00 | (80.00, 90.00) |
|                          | 15-24 | 90.00   | (90.00, 100.00) | 90.00   | (90.00, 100.00) | 90.00   | (90.00, 95.00) | 90.00 | (90.00, 99.00) |
|                          | 25-34 | 90.00   | (85.00, 95.00)  | 90.00   | (85.00, 95.00)  | 90.00   | (80.00, 90.00) | 90.00 | (85.00, 90.00) |
|                          | 35-44 | 90.00   | (80.00, 90.00)  | 90.00   | (80.00, 90.00)  | 90.00   | (80.00, 90.00) | 90.00 | (80.00, 90.00) |
|                          | 45-54 | 90.00   | (80.00, 90.00)  | 80.00   | (80.00, 90.00)  | 80.00   | (80.00, 90.00) | 85.00 | (80.00, 90.00) |
|                          | 55-64 | 80.00   | (70.00, 90.00)  | 80.00   | (70.00, 90.00)  | 80.00   | (70.00, 90.00) | 80.00 | (70.00, 90.00) |
|                          | 65-74 | 80.00   | (70.00, 85.00)  | 80.00   | (70.00, 80.00)  | 70.00   | (60.00, 80.00) | 80.00 | (70.00, 80.00) |
|                          | 75+   | 70.00   | (60.00, 80.00)  | 70.00   | (60.00, 80.00)  | 70.00   | (60.00, 80.00) | 70.00 | (60.00, 80.00) |
| Females                  | Total | 80.00   | (75.00, 90.00)  | 80.00   | (70.00, 90.00)  | 80.00   | (70.00, 90.00) | 80.00 | (70.00, 90.00) |
|                          | 15-24 | 90.00   | (90.00, 100.00) | 90.00   | (90.00, 99.00)  | 90.00   | (85.00, 92.00) | 90.00 | (90.00, 95.00) |
|                          | 25-34 | 90.00   | (80.00, 95.00)  | 90.00   | (80.00, 90.00)  | 90.00   | (80.00, 90.00) | 90.00 | (80.00, 90.00) |
|                          | 35-44 | 90.00   | (80.00, 90.00)  | 90.00   | (80.00, 90.00)  | 85.00   | (80.00, 90.00) | 90.00 | (80.00, 90.00) |
|                          | 45-54 | 80.00   | (80.00, 90.00)  | 80.00   | (75.00, 90.00)  | 80.00   | (70.00, 90.00) | 80.00 | (75.00, 90.00) |
|                          | 55-64 | 80.00   | (70.00, 90.00)  | 80.00   | (70.00, 85.00)  | 80.00   | (70.00, 85.00) | 80.00 | (70.00, 90.00) |
|                          | 65-74 | 80.00   | (70.00, 80.00)  | 70.00   | (60.00, 80.00)  | 70.00   | (60.00, 80.00) | 70.00 | (60.00, 80.00) |
|                          | 75+   | 70.00   | (60.00, 80.00)  | 70.00   | (60.00, 80.00)  | 70.00   | (60.00, 80.00) | 70.00 | (60.00, 80.00) |
| <b>Urban</b>             |       |         |                 |         |                 |         |                |       |                |
| All                      | Total | 82.00   | (80.00, 90.00)  | 80.00   | (70.00, 90.00)  | 80.00   | (70.00, 90.00) | 80.00 | (70.00, 90.00) |
|                          | 15-24 | 90.00   | (90.00, 100.00) | 90.00   | (90.00, 100.00) | 90.00   | (85.00, 92.00) | 90.00 | (90.00, 96.00) |
|                          | 25-34 | 90.00   | (82.00, 95.00)  | 90.00   | (80.00, 90.00)  | 90.00   | (80.00, 90.00) | 90.00 | (80.00, 90.00) |
|                          | 35-44 | 90.00   | (80.00, 90.00)  | 90.00   | (80.00, 90.00)  | 85.00   | (80.00, 90.00) | 90.00 | (80.00, 90.00) |
|                          | 45-54 | 80.00   | (80.00, 90.00)  | 80.00   | (70.00, 90.00)  | 80.00   | (70.00, 90.00) | 80.00 | (75.00, 90.00) |
|                          | 55-64 | 80.00   | (70.00, 90.00)  | 80.00   | (70.00, 90.00)  | 80.00   | (70.00, 85.00) | 80.00 | (70.00, 90.00) |
|                          | 65-74 | 80.00   | (70.00, 85.00)  | 75.00   | (60.00, 80.00)  | 70.00   | (60.00, 80.00) | 80.00 | (65.00, 80.00) |
|                          | 75+   | 70.00   | (60.00, 80.00)  | 70.00   | (60.00, 80.00)  | 70.00   | (60.00, 80.00) | 70.00 | (60.00, 80.00) |
| Males                    | Total | 85.00   | (80.00, 90.00)  | 80.00   | (70.00, 90.00)  | 80.00   | (70.00, 90.00) | 80.00 | (75.00, 90.00) |
|                          | 15-24 | 90.00   | (90.00, 100.00) | 90.00   | (90.00, 100.00) | 90.00   | (90.00, 95.00) | 90.00 | (90.00, 99.00) |
|                          | 25-34 | 90.00   | (85.00, 95.00)  | 90.00   | (85.00, 90.00)  | 90.00   | (80.00, 90.00) | 90.00 | (80.00, 90.00) |
|                          | 35-44 | 90.00   | (80.00, 90.00)  | 90.00   | (80.00, 90.00)  | 90.00   | (80.00, 90.00) | 90.00 | (80.00, 90.00) |
|                          | 45-54 | 85.00   | (80.00, 90.00)  | 80.00   | (80.00, 90.00)  | 80.00   | (75.00, 90.00) | 80.00 | (80.00, 90.00) |
|                          | 55-64 | 80.00   | (70.00, 90.00)  | 80.00   | (70.00, 90.00)  | 80.00   | (70.00, 90.00) | 80.00 | (70.00, 90.00) |
|                          | 65-74 | 80.00   | (70.00, 85.00)  | 80.00   | (70.00, 80.00)  | 70.00   | (60.00, 80.00) | 80.00 | (70.00, 80.00) |
|                          | 75+   | 75.00   | (60.00, 80.00)  | 70.00   | (60.00, 80.00)  | 70.00   | (60.00, 80.00) | 70.00 | (60.00, 80.00) |
| Females                  | Total | 80.00   | (75.00, 90.00)  | 80.00   | (70.00, 90.00)  | 80.00   | (70.00, 90.00) | 80.00 | (70.00, 90.00) |

|              |       |       |                 |       |                 |       |                |       |                 |
|--------------|-------|-------|-----------------|-------|-----------------|-------|----------------|-------|-----------------|
|              | 15-24 | 90.00 | (90.00, 100.00) | 90.00 | (90.00, 98.00)  | 90.00 | (80.00, 90.00) | 90.00 | (90.00, 95.00)  |
|              | 25-34 | 90.00 | (80.00, 92.00)  | 90.00 | (80.00, 90.00)  | 90.00 | (80.00, 90.00) | 90.00 | (80.00, 90.00)  |
|              | 35-44 | 90.00 | (80.00, 90.00)  | 90.00 | (80.00, 90.00)  | 80.00 | (80.00, 90.00) | 90.00 | (80.00, 90.00)  |
|              | 45-54 | 80.00 | (80.00, 90.00)  | 80.00 | (70.00, 90.00)  | 80.00 | (70.00, 90.00) | 80.00 | (70.00, 90.00)  |
|              | 55-64 | 80.00 | (70.00, 90.00)  | 80.00 | (70.00, 85.00)  | 80.00 | (70.00, 80.00) | 80.00 | (70.00, 86.00)  |
|              | 65-74 | 80.00 | (70.00, 85.00)  | 70.00 | (60.00, 80.00)  | 70.00 | (60.00, 80.00) | 75.00 | (60.00, 80.00)  |
|              | 75+   | 70.00 | (60.00, 80.00)  | 70.00 | (60.00, 80.00)  | 70.00 | (60.00, 80.00) | 70.00 | (60.00, 80.00)  |
| <b>Rural</b> |       |       |                 |       |                 |       |                |       |                 |
|              | Total | 85.00 | (80.00, 90.00)  | 80.00 | (70.00, 90.00)  | 80.00 | (70.00, 90.00) | 80.00 | (75.00, 90.00)  |
|              | 15-24 | 90.00 | (90.00, 100.00) | 90.00 | (90.00, 100.00) | 90.00 | (90.00, 95.00) | 90.00 | (90.00, 95.00)  |
|              | 25-34 | 90.00 | (90.00, 95.00)  | 90.00 | (85.00, 95.00)  | 90.00 | (80.00, 90.00) | 90.00 | (85.00, 90.00)  |
|              | 35-44 | 90.00 | (80.00, 90.00)  | 90.00 | (80.00, 90.00)  | 90.00 | (80.00, 90.00) | 90.00 | (80.00, 90.00)  |
|              | 45-54 | 90.00 | (80.00, 90.00)  | 80.00 | (80.00, 90.00)  | 80.00 | (78.00, 90.00) | 80.00 | (80.00, 90.00)  |
|              | 55-64 | 80.00 | (70.00, 90.00)  | 80.00 | (70.00, 90.00)  | 80.00 | (70.00, 90.00) | 80.00 | (70.00, 90.00)  |
|              | 65-74 | 80.00 | (70.00, 80.00)  | 70.00 | (60.00, 80.00)  | 70.00 | (60.00, 80.00) | 75.00 | (60.00, 80.00)  |
|              | 75+   | 70.00 | (60.00, 80.00)  | 70.00 | (60.00, 80.00)  | 70.00 | (60.00, 80.00) | 70.00 | (60.00, 80.00)  |
|              | Total | 90.00 | (80.00, 90.00)  | 80.00 | (75.00, 90.00)  | 85.00 | (80.00, 90.00) | 85.00 | (80.00, 90.00)  |
|              | 15-24 | 90.00 | (90.00, 100.00) | 90.00 | (90.00, 100.00) | 90.00 | (90.00, 95.00) | 90.00 | (90.00, 100.00) |
|              | 25-34 | 90.00 | (90.00, 95.00)  | 90.00 | (85.00, 95.00)  | 90.00 | (85.00, 90.00) | 90.00 | (85.00, 95.00)  |
|              | 35-44 | 90.00 | (80.00, 90.00)  | 90.00 | (80.00, 90.00)  | 90.00 | (80.00, 90.00) | 90.00 | (80.00, 90.00)  |
|              | 45-54 | 90.00 | (80.00, 90.00)  | 85.00 | (80.00, 90.00)  | 85.00 | (80.00, 90.00) | 85.00 | (80.00, 90.00)  |
|              | 55-64 | 80.00 | (70.00, 90.00)  | 80.00 | (70.00, 90.00)  | 80.00 | (70.00, 90.00) | 80.00 | (70.00, 90.00)  |
|              | 65-74 | 80.00 | (70.00, 85.00)  | 80.00 | (60.00, 80.00)  | 70.00 | (60.00, 80.00) | 80.00 | (70.00, 80.00)  |
|              | 75+   | 70.00 | (60.00, 80.00)  | 70.00 | (60.00, 80.00)  | 70.00 | (60.00, 80.00) | 70.00 | (60.00, 80.00)  |
|              | Total | 80.00 | (80.00, 90.00)  | 80.00 | (70.00, 90.00)  | 80.00 | (70.00, 90.00) | 80.00 | (70.00, 90.00)  |
|              | 15-24 | 90.00 | (90.00, 100.00) | 90.00 | (90.00, 100.00) | 90.00 | (89.00, 95.00) | 90.00 | (90.00, 95.00)  |
|              | 25-34 | 90.00 | (85.00, 95.00)  | 90.00 | (80.00, 94.00)  | 90.00 | (80.00, 90.00) | 90.00 | (80.00, 90.00)  |
|              | 35-44 | 90.00 | (80.00, 90.00)  | 90.00 | (80.00, 90.00)  | 90.00 | (80.00, 90.00) | 90.00 | (80.00, 90.00)  |
|              | 45-54 | 85.00 | (80.00, 90.00)  | 80.00 | (78.00, 90.00)  | 80.00 | (70.00, 90.00) | 80.00 | (80.00, 90.00)  |
|              | 55-64 | 80.00 | (70.00, 90.00)  | 80.00 | (70.00, 85.00)  | 80.00 | (70.00, 85.00) | 80.00 | (70.00, 90.00)  |
|              | 65-74 | 80.00 | (70.00, 80.00)  | 70.00 | (60.00, 80.00)  | 70.00 | (60.00, 80.00) | 70.00 | (60.00, 80.00)  |
|              | 75+   | 70.00 | (60.00, 80.00)  | 70.00 | (60.00, 80.00)  | 70.00 | (60.00, 80.00) | 70.00 | (60.00, 80.00)  |

Table S5 Utility index scores (Mean, SD) of respondents by gender and age

|         |       | Urban   |       |         |       |         |       |       |       | Rural   |       |         |       |         |       |       |       | Total   |       |         |       |         |       |       |       |
|---------|-------|---------|-------|---------|-------|---------|-------|-------|-------|---------|-------|---------|-------|---------|-------|-------|-------|---------|-------|---------|-------|---------|-------|-------|-------|
|         |       | Eastern |       | Central |       | Western |       | Total |       | Eastern |       | Central |       | Western |       | Total |       | Eastern |       | Central |       | Western |       | Total |       |
|         |       | Mean    | SD    | Mean    | SD    | Mean    | SD    | Mean  | SD    | Mean    | SD    | Mean    | SD    | Mean    | SD    | Mean  | SD    | Mean    | SD    | Mean    | SD    | Mean    | SD    | Mean  | SD    |
| All     | Total | 0.987   | 0.052 | 0.986   | 0.055 | 0.983   | 0.057 | 0.985 | 0.055 | 0.986   | 0.056 | 0.983   | 0.060 | 0.984   | 0.057 | 0.984 | 0.058 | 0.986   | 0.054 | 0.984   | 0.058 | 0.984   | 0.057 | 0.985 | 0.056 |
|         | 15-24 | 0.999   | 0.011 | 0.998   | 0.025 | 0.998   | 0.013 | 0.998 | 0.017 | 0.999   | 0.021 | 0.998   | 0.019 | 0.997   | 0.034 | 0.998 | 0.027 | 0.999   | 0.016 | 0.998   | 0.022 | 0.998   | 0.027 | 0.998 | 0.023 |
|         | 25-34 | 0.998   | 0.019 | 0.998   | 0.020 | 0.997   | 0.024 | 0.998 | 0.021 | 0.998   | 0.017 | 0.997   | 0.028 | 0.997   | 0.032 | 0.997 | 0.026 | 0.998   | 0.018 | 0.997   | 0.023 | 0.997   | 0.028 | 0.997 | 0.024 |
|         | 35-44 | 0.996   | 0.023 | 0.994   | 0.032 | 0.994   | 0.031 | 0.994 | 0.029 | 0.995   | 0.031 | 0.994   | 0.034 | 0.995   | 0.031 | 0.995 | 0.032 | 0.995   | 0.027 | 0.994   | 0.033 | 0.994   | 0.031 | 0.995 | 0.031 |
|         | 45-54 | 0.992   | 0.037 | 0.990   | 0.041 | 0.989   | 0.041 | 0.990 | 0.040 | 0.992   | 0.038 | 0.988   | 0.051 | 0.990   | 0.041 | 0.990 | 0.043 | 0.992   | 0.038 | 0.989   | 0.046 | 0.989   | 0.041 | 0.990 | 0.042 |
|         | 55-64 | 0.987   | 0.048 | 0.985   | 0.053 | 0.981   | 0.056 | 0.984 | 0.052 | 0.985   | 0.054 | 0.979   | 0.062 | 0.978   | 0.062 | 0.981 | 0.059 | 0.986   | 0.051 | 0.981   | 0.058 | 0.980   | 0.059 | 0.983 | 0.056 |
|         | 65-74 | 0.978   | 0.065 | 0.972   | 0.074 | 0.963   | 0.083 | 0.971 | 0.074 | 0.971   | 0.076 | 0.964   | 0.082 | 0.960   | 0.083 | 0.965 | 0.081 | 0.975   | 0.070 | 0.969   | 0.078 | 0.961   | 0.083 | 0.969 | 0.077 |
|         | 75+   | 0.939   | 0.116 | 0.941   | 0.118 | 0.930   | 0.118 | 0.937 | 0.117 | 0.932   | 0.123 | 0.927   | 0.122 | 0.922   | 0.121 | 0.928 | 0.122 | 0.936   | 0.119 | 0.935   | 0.120 | 0.927   | 0.119 | 0.933 | 0.119 |
| Males   | Total | 0.988   | 0.052 | 0.986   | 0.057 | 0.984   | 0.057 | 0.986 | 0.055 | 0.987   | 0.056 | 0.983   | 0.063 | 0.986   | 0.054 | 0.985 | 0.057 | 0.987   | 0.054 | 0.984   | 0.060 | 0.985   | 0.055 | 0.986 | 0.056 |
|         | 15-24 | 0.999   | 0.012 | 0.997   | 0.035 | 0.999   | 0.013 | 0.998 | 0.021 | 0.999   | 0.027 | 0.998   | 0.017 | 0.996   | 0.045 | 0.997 | 0.035 | 0.999   | 0.020 | 0.998   | 0.028 | 0.997   | 0.036 | 0.998 | 0.029 |
|         | 25-34 | 0.998   | 0.019 | 0.997   | 0.027 | 0.997   | 0.024 | 0.997 | 0.023 | 0.997   | 0.021 | 0.996   | 0.037 | 0.997   | 0.034 | 0.997 | 0.031 | 0.998   | 0.020 | 0.996   | 0.032 | 0.997   | 0.030 | 0.997 | 0.027 |
|         | 35-44 | 0.996   | 0.024 | 0.994   | 0.036 | 0.993   | 0.036 | 0.994 | 0.033 | 0.994   | 0.036 | 0.993   | 0.043 | 0.995   | 0.033 | 0.994 | 0.037 | 0.995   | 0.031 | 0.993   | 0.040 | 0.994   | 0.034 | 0.994 | 0.035 |
|         | 45-54 | 0.992   | 0.043 | 0.989   | 0.046 | 0.990   | 0.040 | 0.990 | 0.043 | 0.992   | 0.043 | 0.987   | 0.057 | 0.991   | 0.035 | 0.990 | 0.045 | 0.992   | 0.043 | 0.988   | 0.052 | 0.991   | 0.037 | 0.990 | 0.044 |
|         | 55-64 | 0.988   | 0.051 | 0.984   | 0.062 | 0.984   | 0.047 | 0.985 | 0.054 | 0.986   | 0.054 | 0.980   | 0.062 | 0.982   | 0.055 | 0.983 | 0.057 | 0.987   | 0.052 | 0.982   | 0.062 | 0.983   | 0.052 | 0.984 | 0.055 |
|         | 65-74 | 0.980   | 0.066 | 0.975   | 0.073 | 0.966   | 0.081 | 0.974 | 0.073 | 0.975   | 0.070 | 0.968   | 0.081 | 0.965   | 0.078 | 0.970 | 0.077 | 0.978   | 0.068 | 0.972   | 0.077 | 0.965   | 0.079 | 0.972 | 0.075 |
|         | 75+   | 0.948   | 0.109 | 0.951   | 0.100 | 0.933   | 0.123 | 0.944 | 0.111 | 0.940   | 0.117 | 0.937   | 0.114 | 0.930   | 0.117 | 0.936 | 0.116 | 0.944   | 0.113 | 0.945   | 0.107 | 0.932   | 0.120 | 0.941 | 0.113 |
| Females | Total | 0.986   | 0.053 | 0.986   | 0.054 | 0.983   | 0.057 | 0.985 | 0.055 | 0.985   | 0.056 | 0.982   | 0.058 | 0.983   | 0.059 | 0.984 | 0.058 | 0.986   | 0.054 | 0.984   | 0.056 | 0.983   | 0.058 | 0.984 | 0.056 |
|         | 15-24 | 0.999   | 0.011 | 0.999   | 0.010 | 0.998   | 0.014 | 0.999 | 0.012 | 0.999   | 0.013 | 0.998   | 0.020 | 0.999   | 0.015 | 0.998 | 0.016 | 0.999   | 0.012 | 0.999   | 0.016 | 0.998   | 0.014 | 0.999 | 0.014 |
|         | 25-34 | 0.998   | 0.019 | 0.998   | 0.011 | 0.997   | 0.024 | 0.998 | 0.019 | 0.998   | 0.011 | 0.998   | 0.016 | 0.997   | 0.030 | 0.998 | 0.021 | 0.998   | 0.016 | 0.998   | 0.013 | 0.997   | 0.027 | 0.998 | 0.020 |
|         | 35-44 | 0.996   | 0.022 | 0.994   | 0.028 | 0.994   | 0.026 | 0.995 | 0.025 | 0.996   | 0.025 | 0.995   | 0.024 | 0.994   | 0.029 | 0.995 | 0.026 | 0.996   | 0.024 | 0.995   | 0.026 | 0.994   | 0.027 | 0.995 | 0.026 |
|         | 45-54 | 0.992   | 0.030 | 0.991   | 0.037 | 0.988   | 0.042 | 0.990 | 0.037 | 0.993   | 0.033 | 0.988   | 0.045 | 0.988   | 0.046 | 0.990 | 0.042 | 0.992   | 0.032 | 0.990   | 0.041 | 0.988   | 0.044 | 0.990 | 0.039 |
|         | 55-64 | 0.986   | 0.046 | 0.985   | 0.044 | 0.978   | 0.062 | 0.984 | 0.051 | 0.983   | 0.055 | 0.978   | 0.062 | 0.975   | 0.068 | 0.979 | 0.062 | 0.985   | 0.051 | 0.981   | 0.054 | 0.976   | 0.065 | 0.981 | 0.057 |
|         | 65-74 | 0.976   | 0.063 | 0.970   | 0.075 | 0.960   | 0.085 | 0.969 | 0.075 | 0.967   | 0.081 | 0.959   | 0.083 | 0.955   | 0.089 | 0.961 | 0.085 | 0.972   | 0.072 | 0.966   | 0.079 | 0.958   | 0.087 | 0.965 | 0.079 |
|         | 75+   | 0.932   | 0.120 | 0.931   | 0.133 | 0.927   | 0.114 | 0.930 | 0.122 | 0.925   | 0.128 | 0.917   | 0.129 | 0.915   | 0.124 | 0.920 | 0.127 | 0.929   | 0.123 | 0.925   | 0.132 | 0.922   | 0.118 | 0.926 | 0.124 |





Table S7 Percentage of respondents reporting moderate or severe problems in different countries

| Country        | Data collection year | Simple size   | Mobility    | Self-care   | Usual activities | Pain/discomfort | Anxiety/depression | Utility index | VAS score    |
|----------------|----------------------|---------------|-------------|-------------|------------------|-----------------|--------------------|---------------|--------------|
| Argentina      | 2005                 | 41392         | 10.8        | 2.9†        | 8                | 30.9            | 22.8               | 0.902         | 75.30        |
| Australia      | 2011                 | 5555          | 16.4        | 3.1         | 15.3             | 40.1            | 16.3               | 0.910         | 78.55        |
| Belgium        | 2001–2003            | 2,411         | 12.6        | 4           | 12.4             | 28.5            | 6.6                | 0.891         | 77.60        |
| China          | 2010                 | 8,031         | 5.1         | 2.8         | 5.2              | 10.7            | 8.7                | 0.951         | 80.40        |
| Denmark        | 2000–2001            | 16861         | 10.7        | 2.5         | 17.9             | 36.7            | 16.1               | 0.887         | 83.70        |
| England        | 2008                 | 14763         | 19.4        | 5.6         | 17               | 35.3            | 19.3               | 0.858         | —            |
| Finland        | 2000                 | 8028          | 26.3        | 8.6         | 21               | 47.8            | 13.9               | 0.815         | —            |
| France         | 2001–2003            | 2892          | 13.4        | 4           | 10               | 35.9            | 15                 | 0.892         | 76.80        |
| Germany        | 2001–2003            | 3552          | 15.9        | 2.7         | 9.9              | 27.6            | 4.3                | 0.938         | 77.30        |
| Greece         | 1998                 | 464           | 13.3        | 5.7         | 10.5             | 16.8            | 10.7               | 0.913         | 79.00        |
| Hungary        | 2000                 | 5503          | 19.6        | 6.5         | 14.8             | 39.2            | 35.2               | 0.823         | 71.10        |
| Italy          | 2013                 | 6800          | 13.5        | 3.9         | 12               | 41.6            | 33.5               | 0.915         | 78.22        |
| Japan          | 2013                 | 1143          | 9.3         | 3.2         | 9.9              | 25              | 12.4               | 0.909         | —            |
| Korea          | 2007                 | 1307          | 5.9         | 0.8         | 4.1              | 21.3            | 17.4               | 0.958         | 79.50        |
| Netherlands    | 2001–2003            | 2367          | 11.5        | 3.4         | 13.5             | 34.2            | 3.5                | 0.910         | 82.00        |
| New Zealand    | 1999                 | 1327          | 20          | 4.4         | 21.5             | 40.8            | 21.2               | 0.848         | 80.80        |
| Poland         | 2014                 | 3941          | 23.3        | 9.4         | 19.2             | 45.8            | 33.4               | 0.893         | 73.70        |
| Portuguese     | 2014                 | 1500          | 16.7        | 4.8         | 16.3             | 44.7            | 34.4               | 0.758         | 74.90        |
| Singapore      | 2009-2010            | 6166          | 3.6         | 0.5         | 2.2              | 15.4            | 8.2                | 0.950         | —            |
| Slovenia       | 2000                 | 742           | 29.8        | 14          | 32.9             | 47.2            | 36.4               | 0.788         | 76.40        |
| Spain          | 2001–2003            | 5473          | 13.7        | 4.1         | 11.7             | 22.9            | 7.8                | 0.929         | 75.00        |
| Sri Lanka      | 2012-2013            | 780           | 18.6        | 6           | 7.8              | 33.4            | 15.4               | 0.850         | 81.00        |
| Sweden         | 1994                 | 534           | 8.6         | 1.5         | 7.9              | 40.8            | 26                 | 0.851         | 83.30        |
| Switzerland    | 2007                 | 1956          | 7.9         | 2.4         | 8.8              | 45.7            | 31.6               | 0.830         | 81.70        |
| Thailand       | 2007                 | 1409          | 26.3        | 8.7         | 22.7             | 65              | 47.4               | 0.742         | 79.40        |
| United Kingdom | 1993                 | 3395          | 18.4        | 4.3         | 16.3             | 33              | 21                 | 0.856         | 82.80        |
| United States  | 2000–2002            | 38678         | 18.5        | 3.7         | 17.9             | 48.3            | 23.2               | 0.867         | 80.00        |
| <b>China</b>   | <b>2013</b>          | <b>188720</b> | <b>5.86</b> | <b>3.05</b> | <b>4.64</b>      | <b>12.61</b>    | <b>5.27</b>        | <b>0.985</b>  | <b>80.90</b> |

†Note: Figures in red indicate reported problems lower than those in China; figures in blue indicate Utility index or VAS score higher than those in China.
